# Supplementary material for: Anhydrous proton exchange membrane operated at 200 °C and a well-aligned anode catalyst
Source: Royal Society of Chemistry journal article supplement (doi:10.1039/c1jm12952j), 2011-01-01
Supplement: c1jm12952j.pdf [file c1jm12952j.pdf]

Supporting information for

## Anhydrous proton exchange membrane operated at 200 °C and well-aligned anode catalyst

Qunwei Tang, Yan Li, Ziyang Tang, Jihui Wu\*, Jianming Lin, Miaoliang Huang

Institute of Materials Physical Chemistry, Huaqiao University, 362021 Quanzhou, China;

E-mail: [jhwu@hqu.edu.cn](mailto:jhwu@hqu.edu.cn)

### Additional figures

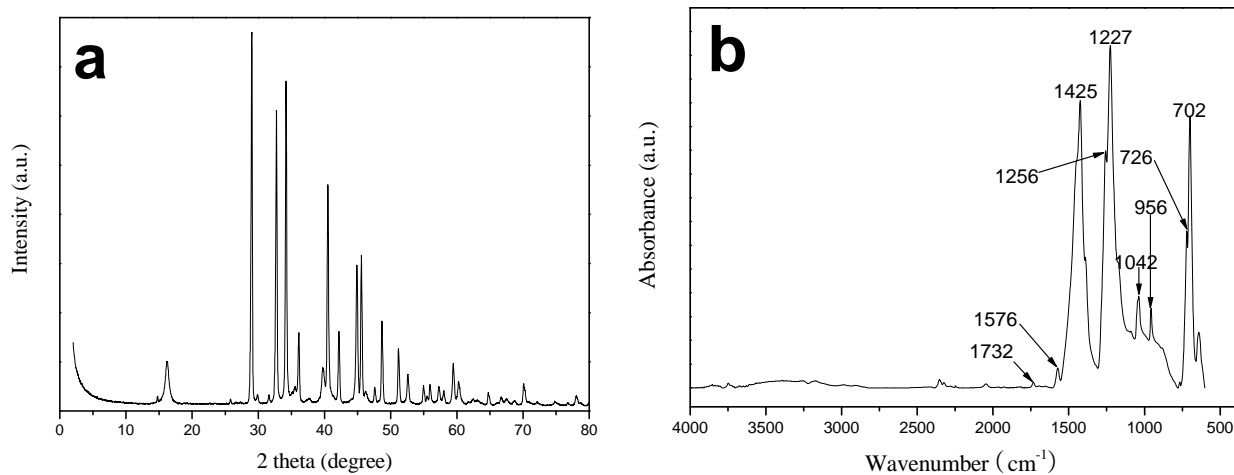

**Fig. S1** (a) XRD pattern and (b) FTIR spectrum of the aligned anode catalyst.

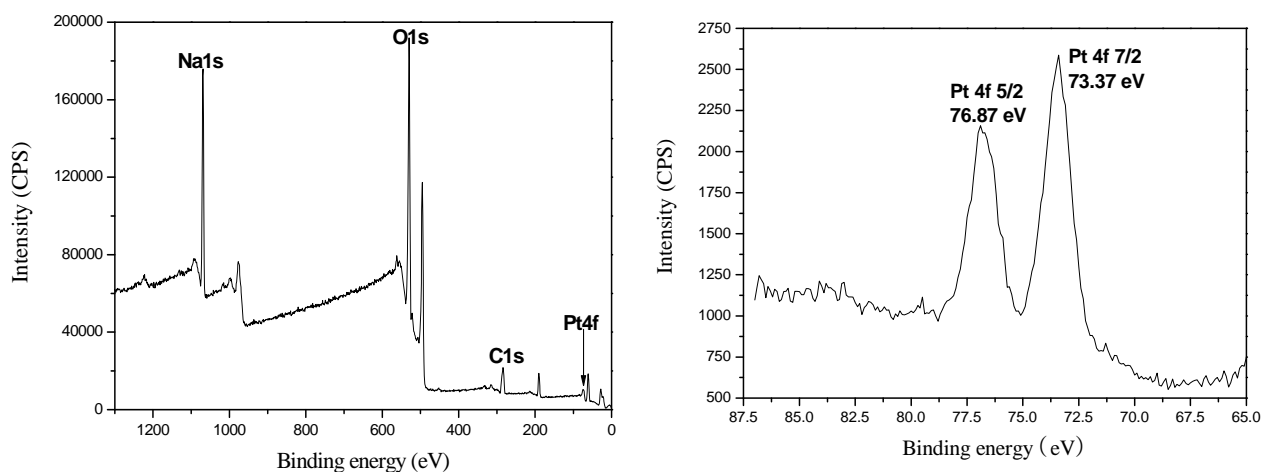

**Fig. S2** XPS spectrum of (a) the aligned anode catalyst and (b) high-resolution XPS spectrum of Pt 4f region.

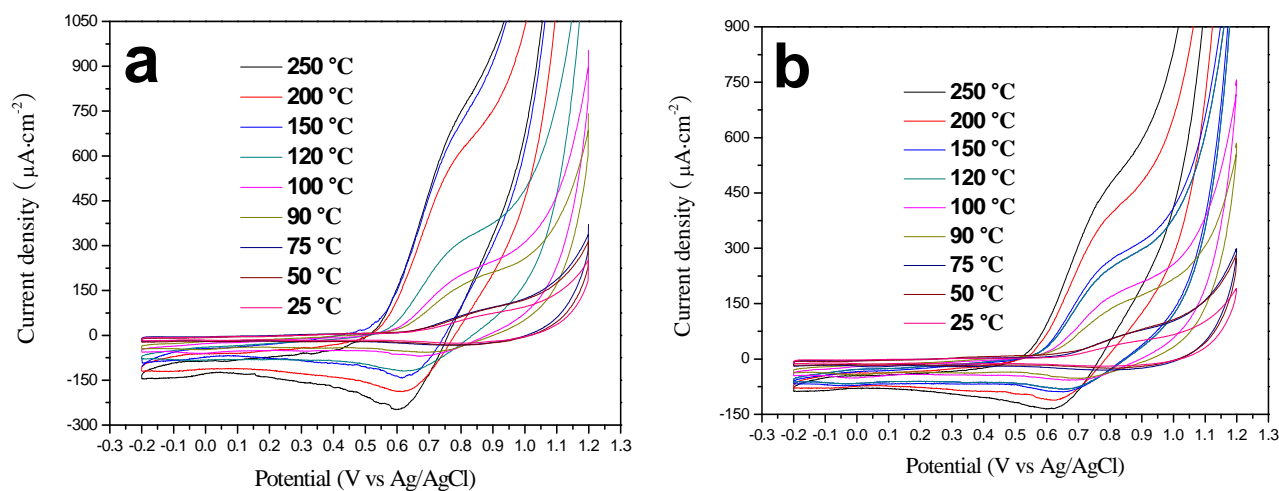

**Fig. S3** Cyclic voltammograms recorded in pure [MIm][Tfo] (a) parallel and (b) perpendicular to the channels of catalysts in the presence of methanol gas flow. Catalyst is used as working electrode, Pt minigrad is counter electrode, Ag/AgCl is reference electrode and melting [MIm][Tfo] is electrolyte. The 2<sup>nd</sup> cycle were plotted at the scan rates of  $100 \text{ mV}\cdot\text{s}^{-1}$  in the temperature range of 25-250 °C.

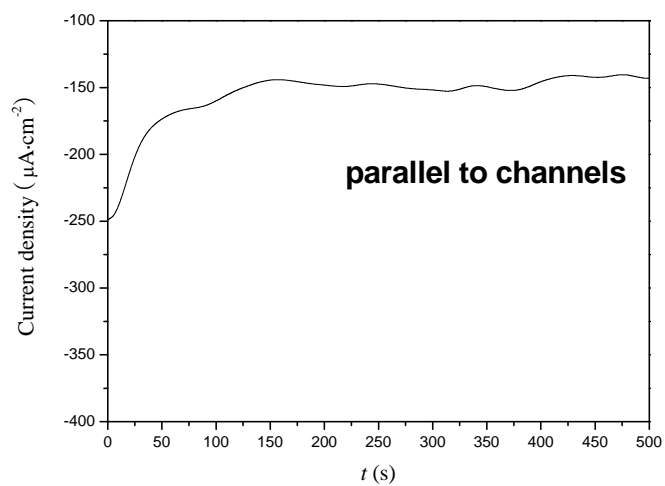

**Fig. S4** Chronoamperometric experiments obtained with well-aligned low-Pt catalyst at 0.59 V in melting [MIm][Tfo] under methanol gas bubbling at 250 °C. To record the stability, the methanol gas was introduced parallel to the channels of catalysts.
